# Supplementary material for: Persistent expression of autoantibodies in SLE patients in remission
Source: PubMed Central journal article supplement — J Exp Med. 2006 Oct 2;203(10):2255–61. doi: 10.1084/jem.20061446 (PMC2118096; doi:10.1084/jem.20061446), 2006-10-02
Supplement: jexpmed_jem.20061446_3.pdf [file jexpmed_jem.20061446_3.pdf]

Yurasov, et al., Table S1

| #  | Ig              | HEAVY |      |    |    |                        | LIGHT  |                |                |              |        | REACTIVITY |       |         |     |       |
|----|-----------------|-------|------|----|----|------------------------|--------|----------------|----------------|--------------|--------|------------|-------|---------|-----|-------|
|    |                 | VH    | D    | RF | JH | CDR3 (aa)              | Length | V <sub>k</sub> | J <sub>k</sub> | CDR3 (aa)    | Length | ssDNA      | dsDNA | Insulin | LPS | HEp-2 |
| 1  | m-SLE100CR-10   | 4-4   | 2-15 | 1  | 4  | RGVRYGCGGGSCYSQDY      | 17     | 3-11           | 3              | QQRSNWPLT    | 9      | X          | X     | X       | X   | X     |
| 2  | m-SLE100CR-14   | 1-18  | 6-13 | 3  | 4  | DRIAAAGTLDY            | 11     | 3-20           | 4              | QQYGSWLT     | 8      | /          | /     | /       | /   | /     |
| 3  | m-SLE100CR-20   | 3-74  | 5-24 | 2  | 5  | DPSRRDGYK              | 9      | 2-30           | 5              | MQGTHWPPSIT  | 11     | /          | /     | /       | /   | /     |
| 4  | m-SLE100CR-21   | 5-51  | 4-11 | 1  | 3  | PRHMTTITDAFDI          | 14     | 3-11           | 1              | QQRSNWPPWT   | 9      | /          | /     | /       | /   | /     |
| 5  | m-SLE100CR-27#  | 3-30  | 3-16 | 3  | 4  | EGDYVWGSYRPLAY         | 15     | 1-5            | 4              | QQYNSYST     | 8      |            |       |         |     |       |
| 6  | m-SLE100CR-29#  | 3-21  | 3-10 | 1  | 4  | TPFPFGSPFDY            | 11     | 3-20           | 3              | QQYGSFFT     | 8      |            |       |         |     |       |
| 7  | m-SLE100CR-31#  | 3-23  | 6-13 | 1  | 5  | GIAAAWLSDW             | 10     | 2D-40          | 5              | MQRIEFPIT    | 9      |            |       |         |     |       |
| 8  | m-SLE100CR-34#  | 4-39  | 3-10 | 2  | 4  | LWFGELLPLD             | 11     | 3-20           | 1              | QQYGSSSWT    | 9      |            |       |         |     |       |
| 9  | m-SLE100CR-38#  | 4-31  | 4-17 | 3  | 4  | DPRNYGDSTGDY           | 12     | 3-20           | 1              | QQYGSSSLWT   | 9      |            |       |         |     |       |
| 10 | m-SLE100CR-40   | 3-15  | 4-17 | 1  | 3  | DYGDYLDAFDI            | 11     | 3-15           | 1              | QQYNNWPPWT   | 10     | /          | /     | /       | /   | /     |
| 11 | m-SLE100CR-42   | 4-39  | 6-19 | 3  | 4  | RIAVAGTPYYFDY          | 13     | 3-15           | 1              | QQYNNWPPGGT  | 11     | /          | /     | /       | /   | X     |
| 12 | m-SLE100CR-44#  | 4-4   | 6-19 | 3  | 6  | ALIAVADNYYGMDV         | 14     | 3-20           | 3              | QQYGSFPIT    | 9      |            |       |         |     |       |
| 13 | m-SLE100CR-45   | 1-18  | 1-20 | 3  | 4  | ESFETGNHPNDY           | 12     | 1-5            | 2              | QQYNSYIGMCS  | 11     | /          | /     | /       | /   | /     |
| 14 | m-SLE100CR-52   | 4-39  | 6-19 | 2  | 2  | PVITPLYSSGANWYFDL      | 17     | 3-20           | 2              | QQYGSSTMCS   | 9      | /          | /     | /       | /   | /     |
| 15 | m-SLE100CR-55   | 4-59  | 3-22 | 1  | 4  | HGSSGYYYY              | 9      | 1D-39          | 1              | QQSYSTPPT    | 9      | /          | /     | /       | /   | /     |
| 16 | m-SLE100CR-57   | 3-30  | 3-10 | 2  | 6  | DMSHSGSNGYYYGMDV       | 16     | 3-20           | 5              | QQYGSPPIT    | 10     | /          | /     | /       | /   | /     |
| 17 | m-SLE100CR-58   | 3-33  | 3-22 | 2  | 4  | DDYDSSGWD              | 10     | 1D-39          | 1              | QQSYSTTWT    | 9      | /          | /     | /       | /   | /     |
| 18 | m-SLE100CR-59k  | 4-34  | 3-22 | 2  | 3  | AQDSSGNRAFDI           | 12     | 1-5            | 1              | QQYNSYSRT    | 9      | X          | X     | X       | X   | X     |
| 19 | m-SLE100CR-62   | 3-21  | 3-10 | 2  | 4  | VGDYVGSYYPFDY          | 14     | 3-20           | 2              | QQYGSPPCS    | 10     | /          | /     | /       | /   | /     |
| 20 | m-SLE100CR-76   | 1-8   | 3-10 | 2  | 4  | RLPDLWVWEGGFYD         | 14     | 1-9            | 3              | QQLNYPGFT    | 10     | /          | /     | /       | /   | X     |
| 21 | m-SLE100CR-83   | 4-34  | 6-13 | 3  | 4  | GQQQADY                | 7      | 3-20           | 4              | QQYGSPPGLT   | 10     | /          | /     | /       | /   | /     |
| 22 | m-SLE100CR-84   | 4-4   | 3-22 | 2  | 3  | YDSSGEDAFDI            | 11     | 3-11           | 3              | QQRSNWPPG    | 9      | /          | /     | /       | /   | /     |
| 23 | m-SLE100CR-115  | 1-46  | 5-24 | 3  | 3  | DRRRRDGYNYKSYAFDI      | 17     | 3-20           | 2              | QQYGSPPRS    | 9      | X          | X     | X       | X   | X     |
| 24 | m-SLE100CR-122# | 1-18  | 3-9  | 3  | 6  | DPTSEGYFDHSDGMDV       | 16     | 1-8            | 1              | QQYYSYPRT    | 9      |            |       |         |     |       |
| 25 | m-SLE100CR-146  | 4-39  | 3-16 | 3  | 4  | HGFTFGVLDY             | 11     | 1-39           | 2              | QQSYSTPYT    | 9      | /          | /     | /       | /   | /     |
| 26 | m-SLE100CR-168# | 4-59  | 3-22 | 2  | 4  | AGRSGYYFDY             | 10     | 1-8            | 1              | QQYYSYPPGT   | 10     |            |       |         |     |       |
| 27 | m-SLE100CR-192  | 3-7   | 3-22 | 1  | 4  | CANYDSSGYYYFDY         | 15     | 3-15           | 3              | QQYNNWPPF    | 9      | /          | /     | /       | /   | /     |
| 28 | m-SLE100CR-196  | 3-53  | 2-21 | 3  | 4  | DPYCGGDCYTNV           | 12     | 1D-39          | 1              | QQSYSTPRT    | 9      | /          | /     | /       | /   | /     |
| #  | m-SLE100CR      | VH    | D    | RF | JH | CDR3 (aa)              | Length | V <sub>k</sub> | J <sub>k</sub> | CDR3 (aa)    | Length | ssDNA      | dsDNA | Insulin | LPS | HEp-2 |
| 29 | m-SLE100CR-9    | 3-33  | 5-18 | 2  | 4  | LGSSYGDGFYD            | 11     | 1-47           | 2              | AAWDDSLSLVW  | 12     | /          | /     | /       | /   | /     |
| 30 | m-SLE100CR-22   | 3-30  | 5-24 | 1  | 4  | TDGYNHFYD              | 10     | 3-21           | 1              | QVWDDSSDRSYV | 12     | /          | /     | /       | /   | /     |
| 31 | m-SLE100CR-26   | 4-59  | 6-13 | 2  | 4  | AESPHPAAGTHFDY         | 14     | 1-51           | 2              | GTWDDSLSAHV  | 12     | /          | /     | /       | /   | /     |
| 32 | m-SLE100CR-37#  | 3-15  | 1-26 | 3  | 4  | DDSGSFSFDY             | 10     | 6-57           | 2              | QSYDSSNHVV   | 10     |            |       |         |     |       |
| 33 | m-SLE100CR-41#  | 4-39  | 6-19 | 3  | 4  | HVGIAVEGPYYFDY         | 14     | 2-14           | 3              | SSYTSSSTFV   | 10     |            |       |         |     |       |
| 34 | m-SLE100CR-47   | 3-73  | 1-26 | 1  | 5  | TSGSYT                 | 7      | 1-51           | 2              | GTWDDSLSAV   | 11     | /          | /     | /       | /   | /     |
| 35 | m-SLE100CR-51   | 5-51  | 6-19 | 2  | 4  | RSESSGWYFDY            | 11     | 3-25           | 3              | QSADSSGYYPV  | 11     | /          | /     | /       | /   | /     |
| 36 | m-SLE100CR-53   | 3-53  | 5-24 | 3  | 6  | DGGTFGDQPYGMDV         | 15     | 1-51           | 2              | GTWDDSLSAGV  | 11     | /          | /     | /       | /   | /     |
| 37 | m-SLE100CR-59λ  |       |      |    |    |                        |        | 2-8            | 1              | SSYAGSNYY    | 10     | X          | X     | X       | X   | X     |
| 38 | m-SLE100CR-64   | 3-48  | 1-26 | 3  | 4  | AGGYSGSYCLGY           | 12     | 3-1            | 2              | QAWDSSTYV    | 10     | /          | /     | /       | /   | /     |
| 39 | m-SLE100CR-68#  | 4-39  | 3-10 | 2  | 4  | LRAPIVPY               | 8      | 7-46           | 7              | LLSYSGAAV    | 9      |            |       |         |     |       |
| 40 | m-SLE100CR-70   | 4-39  | 3-10 | 2  | 5  | QPPRPYSGSYRGVWFDP      | 18     | 6-57           | 2              | QSYDSSRVV    | 9      | /          | /     | /       | /   | X     |
| 41 | m-SLE100CR-74   | 1-18  | 3-10 | 1  | 3  | TGGYRITMVRGVIIEGDDAFDI | 22     | 1-40           | 3              | QSYDSSLSVWV  | 11     | /          | /     | /       | /   | /     |
| 42 | m-SLE100CR-90   | 4-34  | 3-10 | 3  | 6  | GRTRPNYYGSSSEDEV       | 16     | 2-8            | 1              | SSYAGSNYY    | 10     | /          | /     | /       | /   | X     |
| 43 | m-SLE100CR-134  | 5-51  | 3-10 | 1  | 5  | GGDPSGWFDP             | 10     | 1-40           | 3              | QSYDSSLSGWV  | 11     | /          | /     | /       | /   | /     |
| 44 | m-SLE100CR-159  | 4-39  | /    | /  | 3  | HWETTQTIPAGAFDI        | 15     | 2-8            | 2              | SSYAGSNVV    | 10     | X          | X     | X       | X   | X     |
| 45 | m-SLE100CR-169  | 4-39  | 4-23 | 3  | 4  | HRAVTRYYYFDY           | 12     | 1-40           | 1              | QSYDSSLSGTV  | 11     | /          | /     | /       | /   | /     |
| 46 | m-SLE100CR-170  | 4-39  | 3-10 | 3  | 5  | QPPRPYSGSYRGVWLDP      | 18     | 2-8            | 1              | SSYAGSNYY    | 10     | /          | X     | X       | X   | X     |
| 47 | m-SLE100CR-188  | 1-18  | 3-10 | 3  | 6  | DRGGTMRGVINYYGMDV      | 19     | 2-8            | 1              | SSYAGSNYY    | 10     | /          | /     | /       | /   | /     |

# - not expressed





Yurasov, et al., Table S4

| #  | Ig             | HEAVY |      |    |    |                            | Length | LIGHT          |                |             | Length | REACTIVITY |       |         |     |       |
|----|----------------|-------|------|----|----|----------------------------|--------|----------------|----------------|-------------|--------|------------|-------|---------|-----|-------|
|    |                | VH    | D    | RF | JH | CDR3 (aa)                  |        | V <sub>k</sub> | J <sub>k</sub> | CDR3 (aa)   |        | ssDNA      | dsDNA | Insulin | LPS | HEp-2 |
| 1  | m-SLE14CR-1    | 1-69  | 5-18 | 3  | 5  | DLSGYSYGNWFD               | 14     | 1D-39          | 1              | QQSYSTPRT   | 9      | X          | X     | X       | X   | X     |
| 2  | m-SLE14CR-8    | 3-23  | 1-26 | 3  | 4  | EEGVGALFDY                 | 10     | 3-15           | 2              | QQYNNWPPYT  | 10     | /          | /     | /       | /   | /     |
| 3  | m-SLE14CR-20   | 4-4   | 5-24 | 3  | 4  | DPGGDYNWRGPF               | 14     | 3-20           | 1              | QQYGSPPWT   | 9      | /          | /     | /       | /   | X     |
| 4  | m-SLE14CR-26   | 3-21  | 1-26 | 3  | 6  | DAGSYSNPGYYGMDV            | 16     | 1-27           | 1              | QKYNAPRT    | 9      | /          | /     | /       | /   | X     |
| 5  | m-SLE14CR-27   | 3-23  | 3-16 | 2  | 4  | RDPFGVD                    | 7      | 1-17           | 4              | LQHNSYPLT   | 9      | X          | X     | X       | X   | X     |
| 6  | m-SLE14CR-32   | 1-18  | 3-3  | 2  | 4  | GRESDFWSGIYFDY             | 15     | 1D-39          | 1              | QQSYSTPQT   | 9      | /          | /     | /       | /   | /     |
| 7  | m-SLE14CR-36   | 3-23  | /    | /  | 4  | VHY                        | 3      | 3-20           | 1              | QQYGSLLWT   | 9      | X          | X     | X       | X   | /     |
| 8  | m-SLE14CR-49   | 4-4   | 3-9  | 3  | 5  | DGPPGKNYKRNWFD             | 16     | 1D-39          | 3              | QQSYSTLFT   | 9      | /          | /     | /       | /   | /     |
| 9  | m-SLE14CR-51   | 1-46  | 1-26 | 3  | 3  | DVSGGSKDAFDI               | 12     | 1D-39          | 1              | QQSYSTPRT   | 9      | /          | /     | /       | /   | /     |
| 10 | m-SLE14CR-55   | 3-7   | 3-3  | 1  | 4  | YYDFWGGYRYFDY              | 13     | 1D-39          | 4              | QQSYSTSLT   | 9      | /          | /     | /       | /   | /     |
| 11 | m-SLE14CR-59   | 4-34  | 2-15 | 1  | 4  | YGARGAGSGGSCYD             | 15     | 3-20           | 1              | QQYGSPPRT   | 9      | X          | X     | X       | X   | X     |
| 12 | m-SLE14CR-62#  | 3-30  | 6-19 | 2  | 4  | AVGAHYSSADY                | 11     | 1-16           | 4              | QQYNSYPLT   | 9      | /          | /     | /       | /   | /     |
| 13 | m-SLE14CR-64   | 1-69  | 6-19 | 2  | 4  | VYYSSGWYGADY               | 12     | 2D-28          | 4              | MQALQTPLT   | 9      | /          | /     | /       | /   | /     |
| 14 | m-SLE14CR-65#  | 1-69  | 3-10 | 3  | 6  | WYYSGSGSYDGSYYGMDV         | 21     | 3-20           | 3              | QQRSNWPPRG  | 10     | /          | /     | /       | /   | /     |
| 15 | m-SLE14CR-69   | 3-53  | /    | /  | 5  | EAR                        | 3      | 1D-33          | 2              | QQYDNLNPT   | 9      | /          | /     | /       | /   | /     |
| 16 | m-SLE14CR-70   | 1-69  | 3-22 | 3  | 4  | ERSNYDSSGYELG              | 16     | 1D-39          | 2              | QQSYSTPLT   | 10     | /          | /     | /       | /   | X     |
| 17 | m-SLE14CR-74#  | 4-31  | 3-3  | 2  | 6  | AVDWSRKYGGYMDV             | 15     | 3-11           | 5              | QQRSNWPPVT  | 10     | /          | /     | /       | /   | /     |
| 18 | m-SLE14CR-78   | 3-21  | 5-12 | 3  | 6  | DRGGGGYLSGYGMDV            | 16     | 1D-39          | 3              | QQSYSTIFT   | 9      | X          | X     | X       | X   | X     |
| 19 | m-SLE14CR-82   | 4-39  | 4-17 | 3  | 4  | PYGYSAD                    | 7      | 1-27           | 5              | QKYNASAVIT  | 9      | /          | /     | /       | /   | /     |
| 20 | m-SLE14CR-85   | 1-18  | /    | /  | 4  | DRGDGYFDY                  | 10     | 3-20           | 1              | QQYGSPPRT   | 9      | /          | /     | /       | /   | /     |
| 21 | m-SLE14CR-87#  | 1-24  | 4-11 | 2  | 5  | VDYSPRNWFD                 | 11     | 3-20           | 1              | QQYGSPPPT   | 9      | /          | /     | /       | /   | /     |
| 22 | m-SLE14CR-89   | 3-23  | 6-13 | 2  | 3  | VALLRTSSWFNDAFDI           | 17     | 3-20           | 1              | QQYGSPPWT   | 10     | X          | /     | X       | /   | /     |
| 23 | m-SLE14CR-91   | 3-23  | 2-15 | 2  | 4  | GGVCDGSCSYFYFDY            | 15     | 1-27           | 3              | QKYNASAPLFT | 10     | /          | /     | /       | /   | /     |
| 24 | m-SLE14CR-101  | 3-30  | 3-10 | 3  | 4  | GRFGELLYAYFYD              | 15     | 3-15           | 2              | QQYNNWPPYT  | 10     | X          | X     | X       | X   | X     |
| 25 | m-SLE14CR-113  | 1-2   | 3-10 | 2  | 4  | KDYGSGSYFDY                | 12     | 2D-28          | 1              | MQALQTPWT   | 9      | /          | /     | /       | /   | /     |
| 26 | m-SLE14CR-121  | 4-61  | 1-26 | 3  | 4  | DLVGAILFDY                 | 10     | 3-15           | 2              | QQYNNWPP    | 9      | /          | /     | /       | /   | /     |
| 27 | m-SLE14CR-144# | 3-15  | 6-19 | 3  | 4  | DKRVGAVAGIRFDY             | 15     | 1D-39          | 1              | QQSYSTPWT   | 9      | /          | /     | /       | /   | /     |
| 28 | m-SLE14CR-145  | 3-7   | 4-23 | 2  | 5  | GTHYGGNWFDP                | 11     | 1D-39          | 1              | QQSYSTQWT   | 9      | /          | /     | /       | /   | /     |
| 29 | m-SLE14CR-151# | 1-18  | 5-18 | 1  | 6  | QQQLWLLYYGMDV              | 13     | 1D-39          | 5              | QQSYSTPIT   | 9      | /          | /     | /       | /   | /     |
| 30 | m-SLE14CR-153# | 3-23  | 3-22 | 3  | 4  | DGDNYDSSGYYY               | 13     | 3-11           | 4              | QQRSNWPLT   | 10     | /          | /     | /       | /   | /     |
| 31 | m-SLE14CR-154  | 1-18  | 3-22 | 3  | 4  | DWFSYDSSGYIPYFDY           | 17     | 1D-39          | 3              | QQSYSTPR    | 8      | /          | /     | /       | /   | X     |
| 32 | m-SLE14CR-162  | 3-23  | /    | /  | 4  | GSQLAPRSCDY                | 11     | 2D-28          | 2              | MQALQTPRT   | 9      | /          | /     | /       | /   | X     |
| 33 | m-SLE14CR-165  | 1-2   | 3-22 | 2  | 4  | APYYDSSGYYY                | 12     | 1-27           | 1              | QKYNAPWT    | 9      | /          | /     | /       | /   | /     |
| 34 | m-SLE14CR-166  | 3-53  | 3-9  | 2  | 5  | ADFDWLLSS                  | 9      | 3-15           | 2              | QQYNNWPPYT  | 10     | /          | /     | /       | /   | /     |
| 35 | m-SLE14CR-171  | 4-34  | 6-19 | 3  | 4  | GGRQWLVPYSPFDY             | 14     | 1-17           | 5              | LQHNSYPIIT  | 9      | X          | X     | X       | X   | X     |
| 36 | m-SLE14CR-172  | 3-15  | /    | /  | 4  | DGDYNSAVGDY                | 11     | 1D-39          | 3              | QQSYSTPFT   | 9      | X          | X     | X       | X   | X     |
| 37 | m-SLE14CR-176  | 3-53  | /    | /  | 6  | DSDPTGYYYGMDV              | 15     | 1D-39          | 1              | QQSYSTPPT   | 9      | /          | /     | /       | /   | X     |
| 38 | m-SLE14CR-179  | 3-30  | 2-8  | 3  | 6  | GLGMVYATTYGMDV             | 14     | 2D-28          | 3              | MQALQTPFT   | 9      | /          | /     | /       | /   | /     |
| 39 | m-SLE14CR-182# | 3-11  | 6-13 | 1  | 4  | YIDIAAARGFDY               | 13     | 1D-39          | 4              | QQSYSTPT    | 8      | /          | /     | /       | /   | /     |
| 40 | m-SLE14CR-188  | 3-23  | 3-3  | 3  | 4  | GTFYDFWTGPFYD              | 14     | 3-20           | 3              | QQYGSPPPT   | 9      | /          | /     | /       | /   | /     |
| 41 | m-SLE14CR-191  | 3-23  | 5-18 | 1  | 4  | TPPIGTAMARFYD              | 15     | 3-15           | 2              | QQYNNWPPYT  | 9      | /          | /     | /       | /   | /     |
| #  | m-SLE14CR      | VH    | D    | RF | JH | CDR3 (aa)                  | Length | V <sub>k</sub> | J <sub>k</sub> | CDR3 (aa)   | Length | ssDNA      | dsDNA | Insulin | LPS | HEp-2 |
| 42 | m-SLE14CR-15   | 3-21  | 6-19 | 3  | 4  | VGGEYSYSGWYTLDY            | 15     | 2-11           | 3              | CSYAGSYTVVW | 11     | /          | /     | /       | /   | /     |
| 43 | m-SLE14CR-18#  | 1-69  | 2-2  | 1  | 6  | EPYCSSTSCYTTGYYGARYYYYGMDV | 26     | 2-8            | 3              | SSYAGSNWV   | 10     | /          | /     | /       | /   | /     |
| 44 | m-SLE14CR-30   | 4-34  | /    | 3  | 4  | GHYFDY                     | 6      | 2-14           | 3              | SSYTSSTVW   | 10     | /          | /     | /       | /   | /     |
| 45 | m-SLE14CR-40#  | 1-24  | 6-6  | 1  | 5  | VRPDFHSSPYARFDP            | 16     | 2-23           | 1              | CSYAGSSTVY  | 10     | /          | /     | /       | /   | /     |
| 46 | m-SLE14CR-41#  | 3-23  | 2-15 | 1  | 4  | VDFIVVVAQFDY               | 14     | 1-40           | 1              | QSYDSSLGYSV | 11     | /          | /     | /       | /   | /     |
| 47 | m-SLE14CR-42   | 4-34  | 6-19 | 2  | 5  | IPTPGIAVAGKGGHNNWFD        | 20     | 1-40           | 2              | QSYDSSLGYSV | 11     | /          | /     | /       | /   | /     |
| 48 | m-SLE14CR-73   | 3-48  | 5-18 | 1  | 4  | DRGYSYKGDY                 | 10     | 1-44           | 3              | AAWDDSLSNWV | 11     | /          | /     | /       | /   | /     |
| 49 | m-SLE14CR-92#  | 3-48  | 6-19 | 1  | 5  | DGTSGWSVH                  | 9      | 1-47           | 2              | AAWDDRRVW   | 9      | /          | /     | /       | /   | /     |
| 50 | m-SLE14CR-106  | 3-73  | 2-21 | 3  | 4  | PVVTGPDY                   | 8      | 1-47           | 3              | AAWDDSLSAWV | 11     | X          | X     | X       | X   | X     |
| 51 | m-SLE14CR-137  | 4-4   | 3-22 | 3  | 5  | DGDYDSSGYYSSNWFDP          | 17     | 2-14           | 2              | SSYTSSTRV   | 10     | /          | /     | /       | /   | /     |
| 52 | m-SLE14CR-167  | 3-23  | 3-22 | 1  | 2  | AYYYDSSGYYLATPKKADWYFDL    | 23     | 1-40           | 1              | QSYDSSLGYSV | 11     | /          | /     | /       | /   | /     |

# - not expressed

Yurasov, et al., Table S5

| #  | Ig             | HEAVY |      |    |    |                        | CDR3 (aa) | Length         | LIGHT          |               |        | CDR3 (aa) | Length | REACTIVITY |     |       |  |  |
|----|----------------|-------|------|----|----|------------------------|-----------|----------------|----------------|---------------|--------|-----------|--------|------------|-----|-------|--|--|
|    |                | VH    | D    | RF | JH | V <sub>k</sub>         |           |                | J <sub>k</sub> | ssDNA         | dsDNA  |           |        | Insulin    | LPS | HEp-2 |  |  |
| 1  | m-SLE21CR-8    | 4-39  | 2-2  | 3  | 5  | GRDIVVPAAPSNWFDP       | 17        | 1D-39          | 2              | QQSYSTLYT     | 9      | /         | /      | /          | /   | /     |  |  |
| 2  | m-SLE21CR-19   | 4-34  | /    | /  | 3  | LLEDAFDI               | 8         | 3-20           | 4              | QQYGSSLFT     | 9      | /         | /      | /          | /   | /     |  |  |
| 3  | m-SLE21CR-34   | 3-21  | 5-18 | 2  | 4  | VSNTAMVFDY             | 10        | 3-15           | 2              | QQYNNWRGT     | 9      | /         | /      | /          | /   | /     |  |  |
| 4  | m-SLE21CR-41   | 3-48  | 3-10 | 3  | 6  | DQLLWFGESPYYYGMDV      | 17        | 3-20           | 4              | QQYGSSPPLT    | 10     | /         | /      | /          | /   | /     |  |  |
| 5  | m-SLE21CR-43   | 3-15  | 1-26 | 3  | 3  | KWELLRDAFDI            | 11        | 3-20           | 4              | QQYGSSLT      | 8      | /         | /      | /          | /   | /     |  |  |
| 6  | m-SLE21CR-47   | 4-59  | 7-27 | 2  | 4  | GGNWGFYDY              | 9         | 1-39           | 1              | QQSYSTPPET    | 10     | /         | /      | /          | /   | /     |  |  |
| 7  | m-SLE21CR-50   | 4-4   | 3-3  | 3  | 4  | GFLGARKKGYFDY          | 14        | 3-20           | 3              | QQYGSSLFT     | 9      | X         | X      | X          | X   | X     |  |  |
| 8  | m-SLE21CR-58   | 4-39  | 3-10 | 2  | 4  | PMVRGVRGGDDY           | 12        | 1-17           | 1              | LQHNSYPWT     | 9      | /         | /      | /          | /   | X     |  |  |
| 9  | m-SLE21CR-63   | 3-49  | 3-22 | 3  | 6  | GYYDSSGYLDYYYYGMDV     | 19        | 1-39           | 2              | QQSYSTPHT     | 9      | /         | /      | /          | /   | /     |  |  |
| 10 | m-SLE21CR-68   | 4-4   | /    | /  | 2  | ASQGYFDL               | 8         | 1-5            | 1              | QQYNSYWT      | 8      | X         | X      | X          | X   | X     |  |  |
| 11 | m-SLE21CR-70   | 4-34  | 2-2  | 3  | 3  | GWYCSSTSCYEDAFDI       | 16        | 4-1            | 1              | QQYSTPPT      | 9      | /         | /      | /          | /   | /     |  |  |
| 12 | m-SLE21CR-76   | 4-34  | 3-22 | 3  | 4  | RTYYDSSGYSFNY          | 14        | 1-9            | 3              | QQLNSYPLT     | 9      | /         | /      | /          | /   | /     |  |  |
| 13 | m-SLE21CR-79   | 3-15  | 3-22 | 3  | 4  | EDSKSHYYDSSGYQDY       | 16        | 3-11           | 2              | QQRSNWPPYT    | 10     | /         | /      | /          | /   | /     |  |  |
| 14 | m-SLE21CR-89   | 4-34  | 2-8  | 3  | 4  | DSGTMYADFFDY           | 12        | 1-39           | 2              | QQSYSTLLY     | 10     | /         | /      | /          | /   | /     |  |  |
| 15 | m-SLE21CR-94   | 3-48  | /    | /  | 3  | LSRDDAFDI              | 9         | 3-11           | 4              | QQRSNWLT      | 8      | /         | /      | /          | /   | /     |  |  |
| 16 | m-SLE21CR-102  | 3-30  | /    | /  | 4  | ASFRSFDY               | 8         | 3-20           | 1              | QQYGSSPWT     | 9      | X         | X      | X          | X   | X     |  |  |
| 17 | m-SLE21CR-105# | 3-20  | /    | /  | 6  | VLGSSGYGMDV            | 11        | 1-39           | 1              | QQSYSTLRT     | 9      | /         | /      | /          | /   | /     |  |  |
| 18 | m-SLE21CR-111  | 3-48  | /    | /  | 6  | VRGYVMGDV              | 9         | 1-16           | 3              | QQYNSYPLT     | 9      | /         | /      | /          | /   | /     |  |  |
| 19 | m-SLE21CR-131  | 3-30  | 1-26 | 2  | 6  | GPLVGATLYSGYYGMDV      | 17        | 1-39           | 2              | QQSYSTPYT     | 9      | /         | /      | /          | /   | /     |  |  |
| 20 | m-SLE21CR-140  | 1-69  | 5-18 | 1  | 6  | SRIPRKTRDGYSGEYYYYYMDV | 24        | 3-20           | 4              | QQYGSSPPVT    | 10     | X         | X      | X          | X   | X     |  |  |
| 21 | m-SLE21CR-141  | 4-39  | 6-19 | 2  | 1  | QKPGYSSGWRRAEYFQH      | 19        | 3-15           | 1              | QQYNNWPLGT    | 11     | X         | X      | X          | X   | X     |  |  |
| 22 | m-SLE21CR-144  | 4-31  | 2-2  | 2  | 3  | FVVAAFDI               | 9         | 2-40           | 2              | MQRPESSVLRRT  | 12     | /         | /      | /          | /   | /     |  |  |
| 23 | m-SLE21CR-153  | 3-33  | /    | /  | 6  | DELHQGIYYGMDV          | 14        | 3-20           | 4              | QQYGSSLT      | 8      | /         | /      | /          | /   | /     |  |  |
| 24 | m-SLE21CR-155  | 4-59  | 1-26 | 3  | 2  | SVGATSRFYDL            | 11        | 4-1            | 4              | QQYSTLLT      | 9      | X         | X      | X          | X   | X     |  |  |
| 25 | m-SLE21CR-160  | 4-34  | 5-24 | 3  | 6  | GVEEMATIEAYMDV         | 15        | 1-39           | 3              | QQSYSTPS      | 8      | /         | /      | /          | /   | /     |  |  |
| 26 | m-SLE21CR-162  | 4-59  | 5-18 | 1  | 3  | DTVDTAMAPDAFDI         | 14        | 3-11           | 3              | QQRSNWPPV     | 9      | /         | /      | /          | /   | /     |  |  |
| 27 | m-SLE21CR-173# | 3-11  | 6-13 | 1  | 5  | GDFIAAAGSKGLFDP        | 15        | 3-15           | 4              | QQYNNWPLT     | 9      | /         | /      | /          | /   | /     |  |  |
| 28 | m-SLE21CR-186# | 1-18  | /    | /  | 4  | DPQLGDFDY              | 9         | 1-5            | 2              | QQYNSYT       | 7      | /         | /      | /          | /   | /     |  |  |
| 29 | m-SLE21CR-188  | 3-7   | 2-2  | 1  | 6  | VFEYCSSTSCFDYYYGMDV    | 19        | 1-39           | 1              | QQSYSTPWT     | 9      | /         | /      | /          | /   | /     |  |  |
| 30 | m-SLE21CR-193  | 4-34  | 1-26 | 1  | 3  | SWELSPDAFDI            | 12        | 4-1            | 2              | QQYSTLYT      | 9      | /         | /      | /          | /   | /     |  |  |
| #  | m-SLE21CR      | VH    | D    | RF | JH | CDR3 (aa)              | Length    | V <sub>k</sub> | J <sub>k</sub> | CDR3 (aa)     | Length | ssDNA     | dsDNA  | Insulin    | LPS | HEp-2 |  |  |
| 31 | m-SLE21CR-59   | 1-69  | /    | /  | 6  | GLTKRPHYYYYMDV         | 14        | 2-14           | 2              | SSYTSSTLVV    | 11     | X         | X      | X          | X   | /     |  |  |
| 32 | m-SLE21CR-64   | 3-15  | 4-17 | 3  | 4  | DRIGRGPELAATVTKVDY     | 19        | 3-22           | 3              | LSGDEDNPRV    | 10     | /         | /      | /          | /   | /     |  |  |
| 33 | m-SLE21CR-78   | 5-51  | 1-26 | 3  | 4  | HSEGVGATPYDFDY         | 15        | 1-40           | 3              | QSYDSSLGTV    | 10     | /         | /      | /          | /   | /     |  |  |
| 34 | m-SLE21CR-82#  | 4-34  | /    | /  | 4  | RRRAKIIDY              | 9         | 1-51           | 3              | GTWDSSLSVWV   | 11     | /         | /      | /          | /   | /     |  |  |
| 35 | m-SLE21CR-86   | 3-23  | 6-13 | 2  | 1  | DRNPIAAAGTAEYFQH       | 17        | 1-51           | 3              | GTWDSSLSAGV   | 11     | /         | /      | /          | /   | X     |  |  |
| 36 | m-SLE21CR-107  | 1-2   | 1-26 | 3  | 5  | GGSYLWNWFDV            | 11        | 2-11           | 1              | CSYAGSYTSYV   | 11     | /         | /      | /          | /   | /     |  |  |
| 37 | m-SLE21CR-125  | 4-59  | /    | /  | 6  | ERSSYRSCYMDV           | 12        | 1-51           | 3              | GTWDSSLSAEV   | 11     | X         | X      | X          | X   | X     |  |  |
| 38 | m-SLE21CR-128  | 3-49  | 6-19 | 3  | 4  | GGDSGWYVVPDY           | 13        | 2-8            | 3              | SSYAGSNNSGV   | 11     | /         | /      | /          | /   | /     |  |  |
| 39 | m-SLE21CR-136  | 1-18  | 6-19 | 2  | 5  | VEAVAGSNWFDV           | 12        | 1-44           | 2              | AAWDDSLNGLV   | 11     | /         | /      | /          | /   | /     |  |  |
| 40 | m-SLE21CR-138  | 1-69  | 6-13 | 2  | 4  | GSLQQPSDYDY            | 11        | 1-40           | 2              | QSYDSSLSGWDVV | 13     | /         | /      | /          | /   | /     |  |  |
| 41 | m-SLE21CR-142  | 3-66  | 3-16 | 3  | 4  | DQLLGGVADDY            | 11        | 1-47           | 3              | AAWDDSLSGRV   | 11     | /         | /      | /          | /   | /     |  |  |
| 42 | m-SLE21CR-149  | 3-48  | /    | /  | 6  | VDYYYYYGMVDV           | 11        | 2-11           | 2              | CSYAGSYTLV    | 10     | /         | /      | /          | /   | X     |  |  |
| 43 | m-SLE21CR-154  | 4-31  | 6-13 | 2  | 5  | GAEQQLDANWFDV          | 13        | 2-14           | 3              | SSYTSSSWV     | 10     | /         | /      | /          | /   | /     |  |  |
| 44 | m-SLE21CR-168  | 4-28  | /    | /  | 4  | ANPPVDY                | 7         | 2-14           | 3              | SSYTSSTWV     | 10     | /         | /      | /          | /   | /     |  |  |
| 45 | m-SLE21CR-174  | 1-2   | 2-2  | 2  | 5  | GGARQLLWLANWFDV        | 16        | 2-14           | 1              | SSYTSSTLNYV   | 12     | X         | X      | X          | X   | X     |  |  |
| 46 | m-SLE21CR-181  | 3-73  | 1-26 | 3  | 4  | HGVVGATTNFDY           | 12        | 1-40           | 3              | QSYDSSLSGSV   | 11     | /         | /      | /          | /   | /     |  |  |
| 47 | m-SLE21CR-183  | 3-48  | /    | /  | 3  | APRFGSWFASDAFDI        | 15        | 1-47           | 2              | AAWDDSLSGPCVV | 13     | /         | /      | /          | /   | /     |  |  |
| 48 | m-SLE21CR-190# | 4-34  | 6-6  | 1  | 4  | RIAAPGNFDY             | 11        | 2-14           | 2              | SSYTSSTLVV    | 11     | /         | /      | /          | /   | /     |  |  |
| 49 | m-SLE21CR-192  | 3-23  | 3-3  | 2  | 5  | DLNHAYDFWGSYHA         | 15        | 2-23           | 1              | CSYAGYWNV     | 9      | /         | /      | /          | /   | /     |  |  |
| 50 | m-SLE21CR-194  | 1-24  | 3-10 | 3  | 5  | EGLLLWFLGGFDP          | 13        | 2-23           | 3              | CSYAGSSSRV    | 10     | /         | /      | /          | /   | /     |  |  |

# - not expressed

| #  | Ig             | HEAVY |      |    |    |                        | Length | LIGHT          |                |             | REACTIVITY |       |       |         |     |       |
|----|----------------|-------|------|----|----|------------------------|--------|----------------|----------------|-------------|------------|-------|-------|---------|-----|-------|
|    |                | VH    | D    | RF | JH | CDR3 (aa)              |        | V <sub>k</sub> | J <sub>k</sub> | CDR3 (aa)   | Length     | ssDNA | dsDNA | Insulin | LPS | HEp-2 |
| 1  | m-SLE33CR-3#   | 1-18  | 3-3  | 3  | 4  | DPGITIFGVVPIPLVYFDY    | 19     | 3-20           | 1              | QQYGSSSRGT  | 9          |       |       |         |     |       |
| 2  | m-SLE33CR-4    | 4-59  | 6-6  | 3  | 2  | DAGIAARNYYYYYMDV       | 16     | 1D-39          | 1              | QQSYSTPRT   | 9          | /     | /     | /       | /   | X     |
| 3  | m-SLE33CR-5#   | 3-53  | 6-19 | 3  | 4  | PPGYSSGWDYLDY          | 13     | 3-11           | 1              | QQRSNWPWT   | 9          |       |       |         |     |       |
| 4  | m-SLE33CR-6    | 4-4   | 6-25 | 3  | 6  | VLVRGRSGWSPGFEDYYYYMDV | 22     | 1-5            | 1              | QQYNSYSWT   | 9          | X     | X     | X       | X   | X     |
| 5  | m-SLE33CR-7#   | 3-53  | 2-2  | 3  | 5  | GLGYCSSTSCVNWFDY       | 16     | 1D-33          | 5              | QQYDNLPLT   | 9          |       |       |         |     |       |
| 6  | m-SLE33CR-9    | 3-9   | 3-9  | 1  | 4  | DEGYDILTGIFYDY         | 13     | 1D-39          | 2              | QQSYSTMVY   | 9          | /     | /     | /       | /   | /     |
| 7  | m-SLE33CR-11   | 5-51  | 6-25 | 1  | 3  | GQVAGSAFDI             | 10     | 1D-39          | 1              | QQSYSTLWT   | 9          | /     | /     | /       | /   | /     |
| 8  | m-SLE33CR-13   | 3-11  | 3-10 | 2  | 5  | DEGMVRGVHP             | 10     | 1-9            | 4              | QQLNSYPRIT  | 10         | /     | /     | /       | /   | X     |
| 9  | m-SLE33CR-17#  | 3-7   | 3-3  | 3  | 6  | DRVLEWPRNGYYYYYMDV     | 17     | 3-11           | 5              | QQRSNWPPIT  | 10         |       |       |         |     |       |
| 10 | m-SLE33CR-18   | 1-18  | 3-22 | 3  | 4  | GDSSGYASYD             | 11     | 4-1            | 4              | QQYSTPLT    | 9          | /     | /     | /       | /   | /     |
| 11 | m-SLE33CR-21   | 3-48  | 4-17 | 1  | 4  | WHGDPYFDY              | 9      | 1-6            | 1              | LQDYNYPWT   | 9          | /     | /     | /       | /   | /     |
| 12 | m-SLE33CR-22   | 4-59  | 2-2  | 1  | 6  | RGVVAANSYYYYYMDV       | 18     | 1D-39          | 1              | QQSYSTPQT   | 9          | /     | /     | /       | /   | /     |
| 13 | m-SLE33CR-25#  | 3-53  | /    | /  | 4  | EKSTVRIVGGESDY         | 15     | 4-1            | 2              | QQYYSTPGYT  | 10         |       |       |         |     |       |
| 14 | m-SLE33CR-26   | 3-30  | 3-16 | 2  | 4  | DQGWWDYVWGSYRYTAFDY    | 18     | 4-1            | 2              | QQYYSTSyt   | 9          | /     | /     | /       | /   | /     |
| 15 | m-SLE33CR-31   | 4-59  | 2-2  | 2  | 6  | EGPIVVVPADNL           | 12     | 4-1            | 4              | QQYYSTPLT   | 9          | /     | /     | /       | /   | /     |
| 16 | m-SLE33CR-32   | 3-30  | 3-10 | 2  | 4  | DGSRYGSGSYYSNY         | 14     | 1-5            | 1              | QQYGT       | 5          | X     | X     | X       | X   | X     |
| 17 | m-SLE33CR-34   | 4-59  | 2-2  | 3  | 4  | IVRPRYCSSTSCYIMDY      | 17     | 1D-39          | 4              | QQSYSTPLT   | 9          | /     | /     | /       | /   | /     |
| 18 | m-SLE33CR-35   | 3-7   | 3-10 | 2  | 4  | DGRPAVGRSPRASGEFDY     | 18     | 2-30           | 2              | MQGTHWPPYT  | 10         | X     | X     | X       | X   | X     |
| 19 | m-SLE33CR-40   | 4-59  | 6-13 | 3  | 6  | VSSIAAAGTFDYYYYYMDV    | 19     | 1D-39          | 4              | QQSYSTLLT   | 9          | /     | /     | /       | /   | X     |
| 20 | m-SLE33CR-43   | 3-53  | 4-17 | 2  | 4  | ADYGDFFDY              | 9      | 3-15           | 2              | QQYNNWPPYT  | 10         | /     | /     | /       | /   | /     |
| 21 | m-SLE33CR-48   | 3-23  | 4-17 | 3  | 3  | DRSTVITRNAFDI          | 13     | 1-27           | 3              | QKYNAPFT    | 9          | /     | /     | /       | /   | /     |
| 22 | m-SLE33CR-53   | 4-34  | 3-10 | 2  | 5  | GIKDYGSGSYMMRASGRFDP   | 24     | 1D-39          | 4              | QQSYSTRGLT  | 10         | X     | X     | X       | X   | X     |
| 23 | m-SLE33CR-57   | 1-2   | 1-1  | 3  | 4  | GANWWDKSDY             | 10     | 1D-39          | 1              | QQSYSTPHT   | 9          | /     | /     | /       | /   | /     |
| 24 | m-SLE33CR-73#  | 3-23  | 6-13 | 2  | 4  | DGDSSSWYGGN            | 11     | 2-29           | 4              | MQGIHLPLT   | 9          |       |       |         |     |       |
| 25 | m-SLE33CR-75#  | 3-13  | /    | /  | 3  | MARGAFDI               | 8      | 1D-33          | 2              | QQYDNLPLYT  | 9          |       |       |         |     |       |
| 26 | m-SLE33CR-76   | 4-59  | 6-6  | 1  | 6  | LGGYSSSSWVGYYYYYMDV    | 21     | 3-20           | 4              | QQYGSLLT    | 8          | /     | /     | /       | /   | X     |
| 27 | m-SLE33CR-79   | 3-21  | 1-26 | 2  | 4  | DQEGVGATIDY            | 11     | 4-1            | 2              | QQYYSTLYT   | 9          | /     | /     | /       | /   | /     |
| 28 | m-SLE33CR-85   | 3-7   | 5-12 | 2  | 6  | EAHSGYETYYYYYMDV       | 18     | 3-20           | 2              | QQYGSPPRMYT | 11         | /     | /     | /       | /   | /     |
| 29 | m-SLE33CR-94   | 3-21  | 2-2  | 1  | 5  | SPSHHVVVPAASFYVGNWFDY  | 22     | 3-15           | 2              | QQYNNWPPYT  | 9          | /     | /     | /       | /   | X     |
| 30 | m-SLE33CR-96   | 1-8   | 3-3  | 2  | 5  | GTVYYDFWGSQGLGWFDY     | 20     | 1D-39          | 2              | QQSYSTPLYT  | 10         | /     | /     | /       | /   | X     |
| 31 | m-SLE33CR-101# | 3-66  | /    | /  | 4  | DRYLYDY                | 7      | 1D-39          | 2              | QQSYSTRMYT  | 10         |       |       |         |     |       |
| 32 | m-SLE33CR-103  | 3-23  | 4-11 | 2  | 4  | PRRVITTFAY             | 9      | 3-20           | 2              | QQYGSPPSMYt | 11         | /     | /     | /       | X   | X     |
| 33 | m-SLE33CR-105# | 3-21  | 3-10 | 2  | 4  | DRDGYGSGSYLYDY         | 15     | 1-8            | 4              | QQYYSYPLT   | 9          |       |       |         |     |       |
| 34 | m-SLE33CR-108  | 3-13  | 6-6  | 2  | 6  | YSSSGHYMDV             | 10     | 1D-39          | 1              | QQSYSTPWT   | 9          | /     | /     | /       | /   | /     |
| 35 | m-SLE33CR-114# | 3-23  | 3-10 | 1  | 4  | SLEMGYGSGSPSDY         | 15     | 1-27           | 1              | QKYNAPRT    | 9          | /     | /     | /       | /   | /     |
| 36 | m-SLE33CR-125# | 3-23  | 6-19 | 3  | 4  | KESSGWRSSVDY           | 12     | 1-17           | 2              | LQHNSYPPYT  | 9          |       |       |         |     |       |
| 37 | m-SLE33CR-129# | 3-21  | 2-2  | 3  | 4  | PQGLLYAGFDY            | 11     | 1D-39          | 2              | QQSYSTRRYT  | 10         |       |       |         |     |       |
| 38 | m-SLE33CR-139  | 1-18  | 3-3  | 2  | 6  | DTDDYDFWSDHYYYYYMDV    | 18     | 2-28           | 1              | MQALQTPRT   | 9          | /     | /     | /       | /   | /     |
| 39 | m-SLE33CR-141  | 4-34  | 6-19 | 1  | 2  | SEGWYPEDWYFDL          | 13     | 1-5            | 4              | QQYNSYSRT   | 9          | /     | /     | /       | /   | /     |
| 40 | m-SLE33CR-149# | 4-54  | 5-18 | 1  | 6  | SPGVRSGSYGYYYYYMDV     | 19     | 3-11           | 4              | QQRSNWLT    | 8          |       |       |         |     |       |
| 41 | m-SLE33CR-151  | 3-49  | 3-10 | 2  | 4  | APTLLWFGDFFDY          | 14     | 1D-39          | 1              | QQSYSTAWT   | 9          | X     | X     | X       | X   | X     |
| 42 | m-SLE33CR-161  | 4-39  | 3-3  | 3  | 4  | RFGWSGYPFDY            | 11     | 1D-39          | 1              | QQSYSTPWT   | 9          | /     | /     | /       | /   | X     |
| 43 | m-SLE33CR-177  | 3-48  | /    | /  | 4  | DREDPVGETVYV           | 12     | 2D-29          | 1              | MQSIQLPWT   | 9          | /     | /     | /       | /   | /     |
| 44 | m-SLE33CR-208# | 3-21  | 3-3  | 2  | 4  | DARSWSGYPRGDFDY        | 15     | 1D-39          | 2              | QQSYSTPQT   | 9          |       |       |         |     |       |
| 45 | m-SLE33CR-214  | 3-64  | /    | /  | 3  | RGGTTLGSADF            | 12     | 1-9            | 2              | QQLNSYPPYT  | 10         | /     | /     | /       | /   | X     |
| 46 | m-SLE33CR-220  | 3-23  | 5-12 | 2  | 6  | DIVATVDYMYMDV          | 13     | 3-20           | 1              | QQYGSPPWT   | 9          | /     | /     | /       | /   | /     |
| 47 | m-SLE33CR-228  | 3-53  | 5-12 | 2  | 3  | DLLYPGYSWFYAFDI        | 15     | 3-20           | 2              | QQYGSPPYT   | 10         | /     | /     | /       | /   | /     |
| 48 | m-SLE33CR-232# | 4-34  | /    | /  | 6  | GRVLYYYYYMDV           | 11     | 3-20           | 2              | QQYGSLLYT   | 9          |       |       |         |     |       |
| 49 | m-SLE33CR-244  | 3-23  | 3-9  | 3  | 4  | DAPFDLTGYFDY           | 13     | 1-17           | 2              | LQHNSYLYT   | 9          | /     | /     | /       | /   | /     |
| 50 | m-SLE33CR-254# | 4-4   | 6-19 | 2  | 3  | EIYSSGWSTDDAFDI        | 15     | 1-27           | 1              | QKYNAPCT    | 9          |       |       |         |     |       |
| 51 | m-SLE33CR-255  | 4-34  | 4-23 | 3  | 4  | VGYGGNSGGLDY           | 12     | 1D-33          | 4              | QQYDNLPLT   | 9          | /     | /     | /       | /   | /     |
| 52 | m-SLE33CR-263  | 3-48  | 2-2  | 1  | 4  | NGYCSSTSCYTGMGY        | 15     | 1-8            | 1              | QQYYSYPWT   | 9          | X     | X     | X       | X   | X     |
| 53 | m-SLE33CR-266# | 1-24  | 6-13 | 1  | 4  | KVHSSWYFFPSDY          | 14     | 4-1            | 5              | QQYYSTPPT   | 9          |       |       |         |     |       |
| 54 | m-SLE33CR-281  | 4-4   | /    | /  | 5  | GLPFDP                 | 6      | 2-28           | 2              | MQALQTPPYT  | 10         | /     | /     | /       | /   | /     |

| #  | m-SLE33CR      | VH   | D    | RF | JH | CDR3 (aa)             | Length | V <sub>L</sub> | J <sub>L</sub> | CDR3 (aa)   | Length | ssDNA | dsDNA | Insulin | LPS | HEp-2 |
|----|----------------|------|------|----|----|-----------------------|--------|----------------|----------------|-------------|--------|-------|-------|---------|-----|-------|
| 55 | m-SLE33CR-14#  | 1-8  | 2-2  | 1  | 6  | RDCSSTSCHEGHGYYYYYMDV | 22     | 2-8            | 3              | SSYAGSNNWV  | 10     |       |       |         |     |       |
| 56 | m-SLE33CR-42#  | 4-34 | 5-12 | 1  | 6  | ARGYSGYGSVYLDV        | 14     | 1-51           | 2              | GTWDSLSAVV  | 11     |       |       |         |     |       |
| 57 | m-SLE33CR-93#  | 3-11 | 5-18 | 2  | 6  | DLRRSEQLWVYYYYMDV     | 17     | 8-61           | 1              | VLYMGSLYV   | 10     |       |       |         |     |       |
| 58 | m-SLE33CR-109  | 1-18 | 4-17 | 2  | 4  | DRSRGLLLDY            | 10     | 6-57           | 2              | QSYDSSNVV   | 9      | /     | /     | /       | /   | /     |
| 59 | m-SLE33CR-157  | 4-34 | /    | /  | 6  | RGEKSRAPKRSHYYYYYMDV  | 20     | 2-14           | 3              | SSYTSSTV    | 9      | X     | X     | X       | X   | X     |
| 60 | m-SLE33CR-203# | 4-34 | 1-26 | 2  | 4  | GRGGSYYFN             | 9      | 1-47           | 2              | AAWDDSLSGVV | 11     |       |       |         |     |       |
| 61 | m-SLE33CR-206  | 1-2  | 3-10 | 1  | 4  | DPASYGSGSPTVDY        | 14     | 2-14           | 3              | SSYTSSTWV   | 10     | /     | /     | /       | /   | X     |
| 62 | m-SLE33CR-217  | 3-21 | 3-10 | 3  | 4  | HTLKTYYYGSGDGY        | 14     | 4-69           | 3              | QWTGTGIRV   | 9      | X     | X     | X       | X   | X     |
| 63 | m-SLE33CR-221  | 3-74 | 6-13 | 2  | 5  | GGSSWEAWFDP           | 12     | 1-47           | 1              | AAWDDSLSGYV | 11     | /     | /     | /       | /   | X     |
